# Supplementary material for: The Severity of Fecal Problems Is Negatively Associated With Quality of Life in a Dutch Population Without Bowel Function Comorbidities
Source: PubMed Central journal article supplement (PMC10846588; doi:10.1097/dcr.0000000000003048), 2023-11-02
Supplement: dcr-67-448-s002.pdf [file dcr-67-448-s002.pdf]

**Supplementary Table 1.** The univariable and multivariable analysis of the severity of constipation and QoL and the severity of FI and QoL.

| Associations between QoL and fecal problems | Constipation                      |         |                                                  |         | Fecal Incontinence                |         |                                                  |         |
|---------------------------------------------|-----------------------------------|---------|--------------------------------------------------|---------|-----------------------------------|---------|--------------------------------------------------|---------|
|                                             | Univariable                       |         | Multivariable <sub>1</sub>                       |         | Univariable                       |         | Multivariable <sub>2</sub>                       |         |
| QoL domains                                 | Correlation coefficient (Pearson) | P value | Unstandardized regression coefficient B (95% CI) | P value | Correlation coefficient (Pearson) | P value | Unstandardized regression coefficient B (95% CI) | P value |
| <b>Physical functioning</b>                 | -.188<br><i>Very low*</i>         | 0.000   | -1.021<br>(-1.227 to -.815)                      | <.001   | -.170<br><i>Very low</i>          | 0.000   | -1.032<br>(-1.337 to -.727)                      | <.001   |
| <b>Social functioning</b>                   | -.328<br><i>Low</i>               | 0.000   | -2.201<br>(-2.430 to -1.972)                     | <.001   | -.177<br><i>Very low</i>          | 0.000   | -0.871<br>(-1.210 to -.532)                      | <.001   |
| <b>Role limitations (physical)</b>          | -.259<br><i>Low</i>               | 0.000   | -1.955<br>(-2.226 to -1.685)                     | <.001   | -.182<br><i>Very low</i>          | 0.000   | -1.280<br>(-1.681 to -.880)                      | <.001   |
| <b>Role limitations (emotional)</b>         | -.310<br><i>Low</i>               | 0.000   | -2.413<br>(-2.681 to -2.145)                     | <.001   | -.171<br><i>Very low</i>          | 0.000   | -1.019<br>(-1.416 to -.621)                      | <.001   |
| <b>Mental health</b>                        | -.332<br><i>Low</i>               | 0.000   | -1.864<br>(-2.053 to -1.675)                     | <.001   | -.157<br><i>Very low</i>          | 0.000   | -0.568<br>(-.847 to -.288)                       | <.001   |
| <b>Vitality</b>                             | -.330<br><i>Low</i>               | 0.000   | -1.920<br>(-2.115 to -1.725)                     | <.001   | -.162<br><i>Very low</i>          | 0.000   | -0.599<br>(-.887 to -.310)                       | <.001   |
| <b>Pain</b>                                 | -.288<br><i>Low</i>               | 0.000   | -1.824<br>(-2.042 to -1.607)                     | <.001   | -.164<br><i>Very low</i>          | 0.000   | -0.757<br>(-1.079 to -.435)                      | <.001   |
| <b>General health perception</b>            | -.257<br><i>Low</i>               | 0.000   | -1.420<br>(-1.616 to -1.224)                     | <.001   | -.167<br><i>Very low</i>          | 0.000   | -0.816<br>(-1.106 to -.525)                      | <.001   |

1. Corrected for the severity of fecal incontinence, level of education and place of residence.
2. Corrected for the severity of constipation, level of education and place of residence.
